# Supplementary material
Source: PubMed Central journal article supplement (PMC3647971)
Supplement: MCB.00156-13_zmb999109965so1.pdf [file MCB.00156-13_zmb999109965so1.pdf]

## Supplementary Information (Badjatia *et al.*)

**Table S1** Accession numbers of relevant *T. brucei* genes

**FIG S1** *CRK1* and *CRK3* expression silencing

**FIG S2** *CRK9* silencing in bloodstream trypanosomes

**FIG S3** *CRK7* silencing in procyclic trypanosomes

**FIG S4** Anti-*CRK9* chromatin immunoprecipitation

**FIG S5** *CRK9* silencing does not affect SL RNA pseudouridylation

**Table S2** List of oligonucleotides

**Table S1** Accession numbers of relevant *T. brucei* genes

| Gene        | Accession number <sup>1</sup>            |
|-------------|------------------------------------------|
| <i>RPB1</i> | Tb927.4.5020, Tb927.8.7400               |
| <i>CRK1</i> | Tb927.10.1070                            |
| <i>CRK3</i> | Tb927.10.4990                            |
| <i>CRK7</i> | Tb927.7.1900                             |
| <i>CRK9</i> | Tb927.2.4510                             |
| <i>MTR1</i> | Tb927.10.7940                            |
| <i>MTR2</i> | Tb927.11.4890 (previously Tb11.02.2500)  |
| <i>MTR3</i> | Tb927.9.12040 (previously Tb09.211.3130) |
| <i>SNIP</i> | Tb927.8.3710                             |

<sup>1</sup> Accession numbers are from the GeneDB ([www.genedb.org](http://www.genedb.org))/TritrypDB ([www.tritrypdb.org](http://www.tritrypdb.org)) genome data bases.

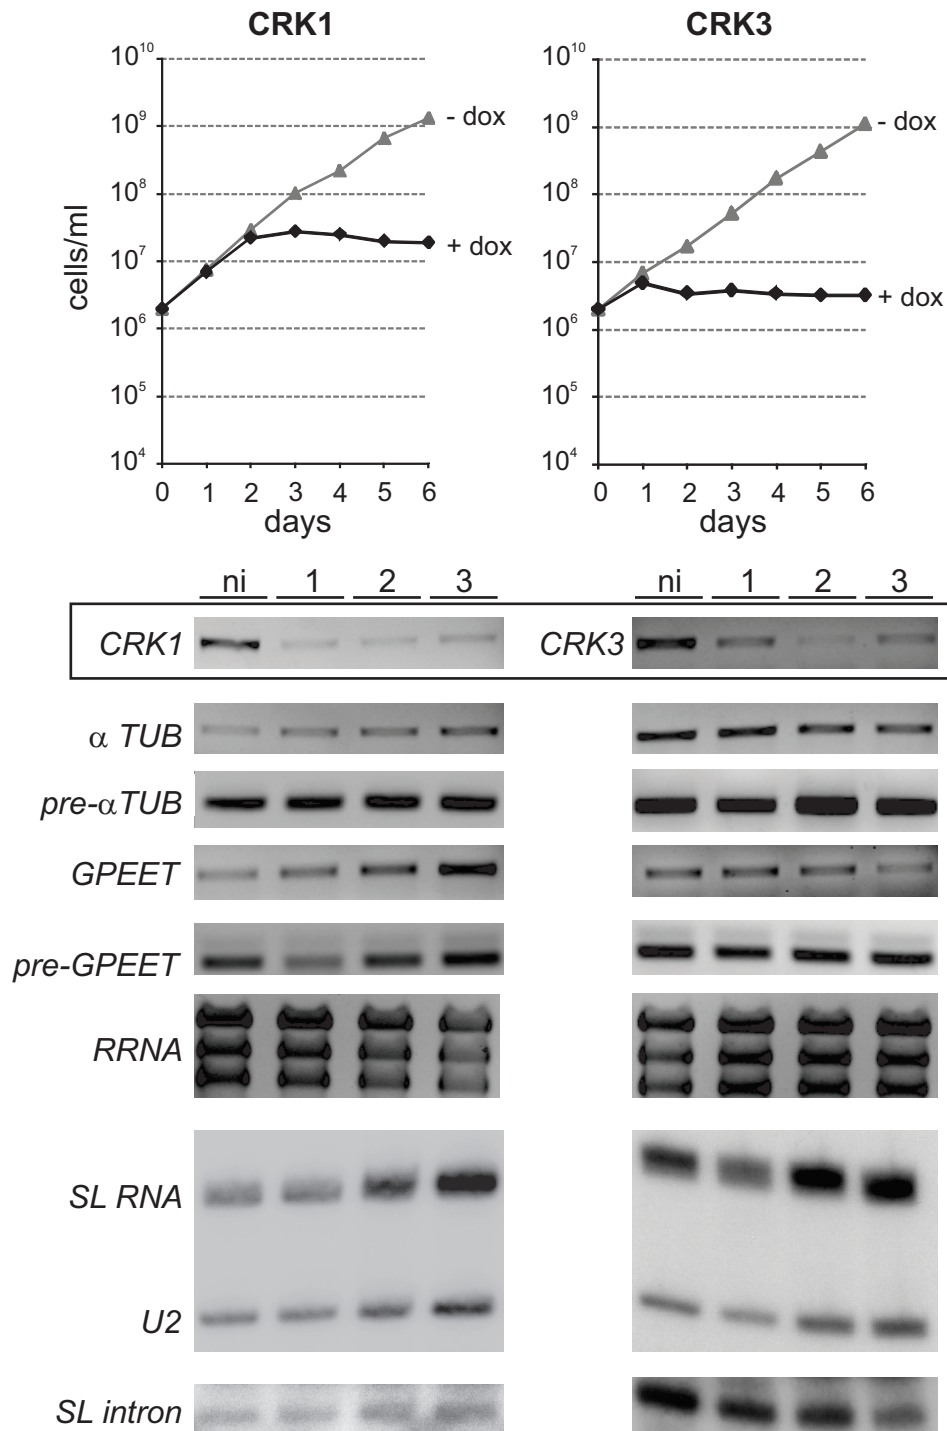

**FIG S1** *CRK1* and *CRK3* expression silencing. For each knockdown, representative growth curves from one of three independently derived clonal cell lines were obtained in the absence and presence of the dsRNA synthesis-inducing reagent doxycycline (-/+ dox). *CRK* mRNA levels were determined by semi-quantitative RT-PCR of total RNA in non-induced (ni) cells and in cells that were silenced for 1 to 3 days (boxed panels). In the same RNA preparations, the relative abundances of  $\alpha$  tubulin ( $\alpha$  TUB) and of *GPEET* procyclin mature and pre-mRNAs were determined by semi-quantitative RT-PCR, those of the large ribosomal RNAs by ethidium bromide staining, and those of the SL RNA, the U2 snRNA, and the SL intron by primer extension assays.

*CRK1* and *CRK3* silencing did not lead to a clear disturbance in gene expression patterns. In case of *CRK1* silencing, however, we did notice a reproducible, minor reduction in rRNA and compensatory increases in other RNAs suggesting a minor function of this kinase in the control of ribosome biogenesis.

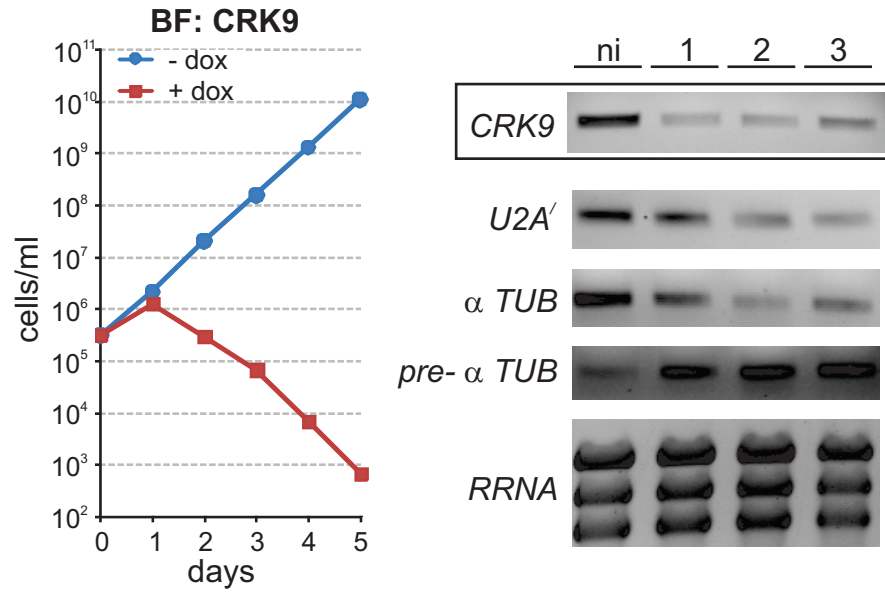

**FIG S2** *CRK9* silencing in bloodstream trypanosomes. A representative growth curve in the absence and presence of the dsRNA synthesis-inducing reagent doxycycline (-/+ dox) of one of two independently derived clonal cell lines. Mature mRNAs of *CRK9*, the spliceosomal protein *U2A'* and  $\alpha$  tubulin ( $\alpha$  *TUB*) as well as pre-mRNA of  $\alpha$  tubulin (pre- $\alpha$  *TUB*) were analyzed by semi-quantitative reverse transcription (RT)-PCR in non-induced (ni) cells and cells that were silenced for 1, 2 or 3 days. The relative RNA abundances show the same trend as in procyclics: mRNA abundances decrease whereas the pre-mRNA level increases in *CRK9*-silenced bloodstream trypanosomes.

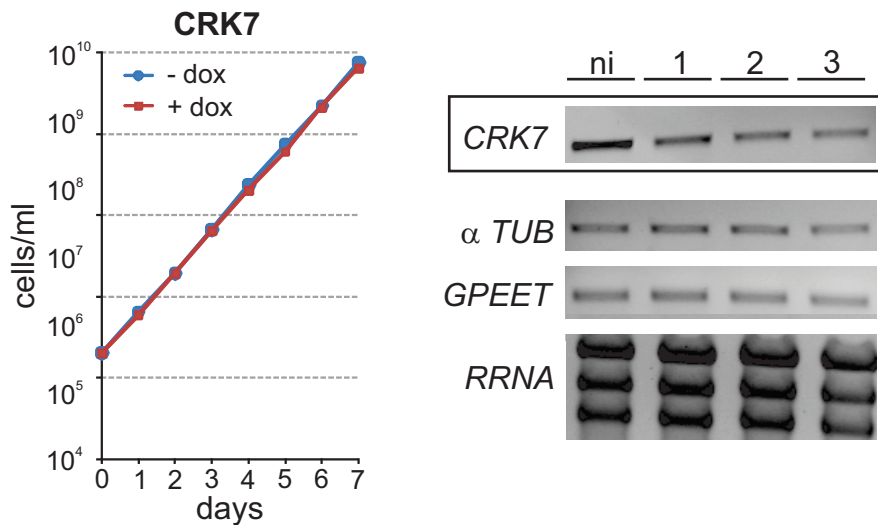

**FIG S3** *CRK7* silencing in procyclic trypanosomes. A representative growth curve of one of three independently derived clonal cell lines obtained in the absence and presence of doxycycline (-/+ dox). Abundances of *CRK7*,  $\alpha$  tubulin ( $\alpha$  *TUB*) and of *GPEET* procyclin mRNA were analyzed in total RNA prepared from non-induced (ni) cells and from cells that were silenced for 1, 2 or 3 days by semi-quantitative RT-PCR. The large ribosomal RNAs were detected by ethidium bromide staining.

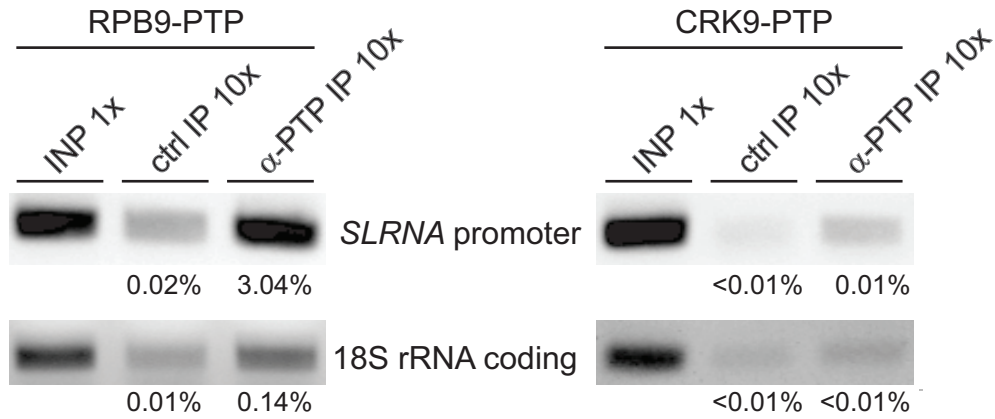

**FIG S4** Anti-CRK9-PTP chromatin immunoprecipitation (ChIP). ChIP experiments were carried out with two cell lines expressing either the RNA pol II subunit RPB9 or CRK9 with a functional fusion of the composite PTP tag. Chromatin was precipitated with a ChIP-grade rabbit polyclonal anti-ProtA antibody ( $\alpha$ -PTP IP). In negative control immunoprecipitations (ctrl IP) a comparable, rabbit-derived non-specific antibody was used. Precipitated DNA was analyzed by amplification of the *SLRNA* promoter region and, as a negative control, of the 18S rRNA coding region. For comparison, DNA of total chromatin (INP) was analyzed. The percent precipitation values specified under each lane were determined by qPCR.

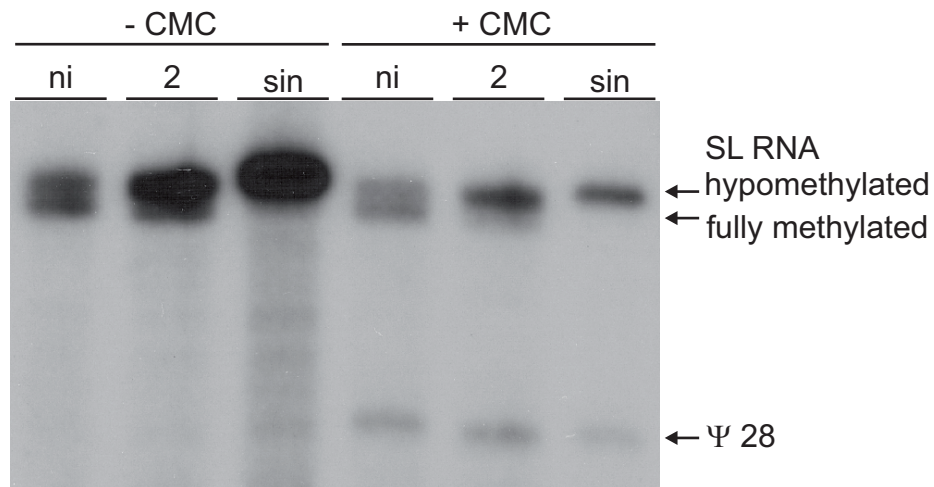

**FIG S5** *CRK9* silencing does not affect SL RNA pseudouridylation. Total RNA, prepared from non-induced cells (ni), from cells in which *CRK9* was silenced for 2 days and from cells which were incubated with the general methyltransferase inhibitor sinefungin (sin) for six hours, was analyzed by primer extension with 5' radiolabeled oligonucleotide SLf. RNA was either mock incubated or treated with *N*-cyclohexyl-*N'*- $\beta$ -(4-methylmorpholinium)ethyl-carbodiimide *p*-tosylate (-/+ CMC) according to a published protocol (Bakin and Ofengand, 1993, *Biochemistry* 32, 9754-9762) to create an extension stop before the pseudouridylated residue at position 28 ( $\Psi$  28). To account for the SL RNA increase in *CRK9*-silenced and sinefungin-treated cells the amount of RNA in these samples was reduced by one half.

**Table S2** List of oligonucleotides

| Gene             | Name             | Usage                                                          | Sequence (5' – 3')                  |
|------------------|------------------|----------------------------------------------------------------|-------------------------------------|
| <i>CRK1</i>      | CRK1 Apal        | RT-PCR of <i>CRK1</i> mRNA                                     | TAGGGCCCGTTACGAGCGGCTTCAGAAGATTG    |
|                  | CRK1 NotI        | RT-PCR of <i>CRK1</i> mRNA                                     | TACGGCCGGAACCTCGACAGAAAAGTATGGGTG   |
| <i>CRK3</i>      | CRK3 Apal        | RT-PCR of <i>CRK3</i> mRNA                                     | TAGGGCCCGGAATCTGGAAAGCGCGAGC        |
|                  | CRK3 NotI        | RT-PCR of <i>CRK3</i> mRNA                                     | GATCGCGGCCGCTACAATGCTTGGGGCGTTAACC  |
| <i>CRK7</i>      | CRK7 Apal        | RT-PCR of <i>CRK7</i> mRNA                                     | TAGGGCCCGACCGATTTGTGCGCGGTGCTCTG    |
|                  | CRK7 EagI        | RT-PCR of <i>CRK7</i> mRNA                                     | TACGGCCGGTACTCGTTGAAATATGTATGAC     |
| <i>CRK9</i>      | CRK9 RNAi-S      | RT-PCR of <i>CRK9</i> mRNA                                     | GTTGTTAAGAAAGAAAATTGAGG             |
|                  | CRK9 3' RT       | RT-(q)PCR of <i>CRK9</i> mRNA                                  | CGCCGCCGCTGCCAACCCCACTC             |
|                  | CRK9 qPCR 5'     | RT-qPCR of <i>CRK9</i> mRNA                                    | GAGGAAGTGCAACAGCAGCG                |
|                  | CRK9 UTR RNAi 5' | RT-PCR of <i>CRK9</i> mRNA                                     | GATAAGCTTACGCGTAGGATGGAAGGGTTGTGAC  |
|                  | CRK9 UTR RNAi 3' | RT-PCR of <i>CRK9</i> mRNA                                     | GATCTAGACTCGAGGCACTCGATACTTCAAAGAGC |
|                  | CRK9 Apa1        | RT-PCR of <i>CRK9</i> mRNA                                     | TAGGGCCCGCTCTGTGAATGAATATGTTCCCG    |
|                  | HA antisense     | RT-PCR of <i>CRK9</i> mRNA                                     | TTAAGCGTAGTCAGGTACGTCGTAAGGGTA      |
| <i>α tubulin</i> | α-Tub Fw q1      | RT-(q)PCR of α tub. pre-mRNA                                   | ACAGTTTCTGTAATATATTG                |
|                  | α-Tub Rv q1      | RT-(q)PCR of α tub. pre-mRNA                                   | GTGGATGCAGATAGCC                    |
|                  | α-Tub Fw q3      | RT-(q)PCR of α tub. mRNA                                       | GTGCATTGAACGTGGATCTG                |
|                  | α-Tub Rv q3      | RT-(q)PCR of α tub. mRNA                                       | GAGAGTTGCTCGTGGTAGGC                |
| <i>GPEET</i>     | Pre-GPEET 5'     | RT-(q)PCR of <i>GPEET</i> pre-mRNA                             | CATGTTCTCGTGATCGCTGC                |
|                  | Pre-GPEET 3'     | RT-(q)PCR of <i>GPEET</i> pre-mRNA                             | GCAGATAAAGGGAACGAGGTGC              |
|                  | GPEET 5'         | RT-(q)PCR of <i>GPEET</i> mRNA                                 | ATGGCACCTCGTTCCTTTATCTGC            |
|                  | GPEET 3'         | RT-PCR of <i>GPEET</i> mRNA                                    | TTAGAATGCGGCAACGAGAGCAGC            |
|                  | GPEET qPCR 3'    | RT-qPCR of <i>GPEET</i> mRNA                                   | CCTTTGCCTCCCTTACGATAAC              |
| <i>18S rRNA</i>  | 18SrRNAcoding5'  | RT-(q)PCR of 18s rRNA                                          | TCATCAAACGTGCGCGATTAC               |
|                  | 18SrRNAcoding3'  | RT-(q)PCR of 18s rRNA                                          | CTATTGAAGCAATATCGG                  |
| <i>SLRNA</i>     | SL_PE            | Primer extension of SL RNA &<br>RT-(q)PCR of <i>SL RNA</i>     | CGACCCACCTTCCAGATTC                 |
|                  | SL sense         | RT-(q)PCR of <i>SL RNA</i>                                     | ACAGTTTCTGTAATATATT                 |
| <i>U1 snRNA</i>  | U1_PE            | Primer extension of U1 snRNA                                   | CACTCAAAGTTTACTGCA                  |
| <i>U2 snRNA</i>  | U2_PE            | Primer extension of U2 snRNA &<br>RT-(q)PCR of <i>U2 snRNA</i> | ACAGGCAACAGTTTTGATCC                |
|                  | U2 5'            | RT-(q)PCR of <i>U2 snRNA</i>                                   | ATATCTTCTCGGCTATTTAGC               |
| <i>U5 snRNA</i>  | U5_PE            | Primer extension of U5 snRNA                                   | CCGCTCGAGGACACCCCAAAGTTT            |
